# Supplementary material
Source: PubMed Central journal article supplement (PMC2925126)
Supplement: NIHMS223935-supplement-suppl.pdf [file NIHMS223935-supplement-suppl.pdf]

### **Supplemental Material and Method:**

**Genome wide mRNA microarray analysis and miRNA qPCR:** To perform a genome wide analysis for mRNA and miRNA changes caused by Droscha and Dicer knockdown, we cultured eight 10 cm plates (approximate  $8 \times 10^6$  cells) of *Dicer*- and *Droscha* - knockdown as well as the control cells on matrigel plates. These cells were harvested after two washes in PBS. Six plates were lysed with Trizol for miRNA profiling and the other two were extracted by use of the RNeasy kit (Qiagen) for mRNA profiling. Each qPCR assay was validated against synthetic target molecules, allowing confident assessment of expression levels across the entire dynamic range of expression observed in biological samples (i.e. copy numbers from  $<1$  to  $>1,000,000/10$  pg total RNA). miRNAs were converted to cDNA in the context of total cellular RNA; modest amounts (~5 ug) of total RNA are required to obtain accurate measurements of ~200 miRNA species. Real-time qPCR data was regressed against standard curves and copies/10pg RNA (copies/cell) were calculated.

For statistical analysis of the data, Eisen Cluster and Tree view-programs were used. The ratios of the net expression levels between differentiated and undifferentiated ES cells were calculated for each pair after background subtraction (Ratio=D/UD). Because we are interested in miRNAs that are expressed abundantly in undifferentiated cells (UD), whenever the D value is 0 or below 0, we assigned it a value of 0.01. If the miRNA was downregulated during differentiation, the ratio should be less than 1.0. The following criteria were set: average of ratio  $\leq 0.75$ , at least four out of five pairs of the ratios are less than 1.0 (consistency) and the average net expression level in UD group  $\geq 10.0$ .

Microarray profiling of RNA extracted from the *Droscha* and *Dicer*-knockdown lines along with RNA from cells transduced with a control vector was carried out as described previously (Jackson et al., 2003).

Hierarchical clustering of miRNA expression was done using Spotfire DecisionSite 9.1 software (Tibco Software Inc), with the following calculation options: clustering method: single linkage (minimum), similarity measure: city block distance, ordering function: average value.

**Karyotyping of the *Dicer* and *Droscha Dicer*-knockdown and control lines:** Karyotype analyses for the hESC lines were processed in the Cell Line Genetics (Madison, Wisconsin) and Cytogenetics lab at UW Seattle. To avoid selection for extra chromosomes, we kept the lines on feeders during growth and expansion periods. However, for three passages prior to experiments, we freed the cultures of feeders to avoid feeder cell contaminations in the analysis. The knockdown and control lines were karyotyped at multiple stages of these experiments. Many of the lines showed normal karyotype in early passage stages. One control and *Dicer*-knockdown pair showed trisomy of Chr 12 and chr 17 already at early stages. However the phenotypic differences between the control and KD lines were still observed.

**miRNA transfection efficiency:** To reveal the transfection efficiencies of our protocol with miRNAs, we quantified the concentrations of miR-195 and -372 two days after transfection with and without electroporation. miR-195 and miR-372 TaqMan assays (ABI) were used to perform miRNA qPCR on a ABI 7300 real-time PCR machine.

**Irradiation of hESCs:** H1 hESCs were seeded on 6cm plates. On day 3, plates were irradiated at 5 Gy or kept non-irradiated for the control. After seven hours these cells were treated with TrypLE Express enzyme (Gibco) at 37 C for three minutes and re-suspended in PBS+ 0.1% BSA (wash buffer). After washing twice with wash buffer cells were fixed with 70% ethanol at 4 C for 1 hour. After washing two more times with the wash buffer, the cells were then stained with PI staining buffer (1XPBS, 2%FBS,

50ug/ml PI, 200ug/ml RNase A, 0.1% Igepal) for three hours and run on BD FACS Canto II machine. Data were analyzed using Watson Pragmatic model (FlowJo software, Tree Star, Inc).

Supplementary Figures

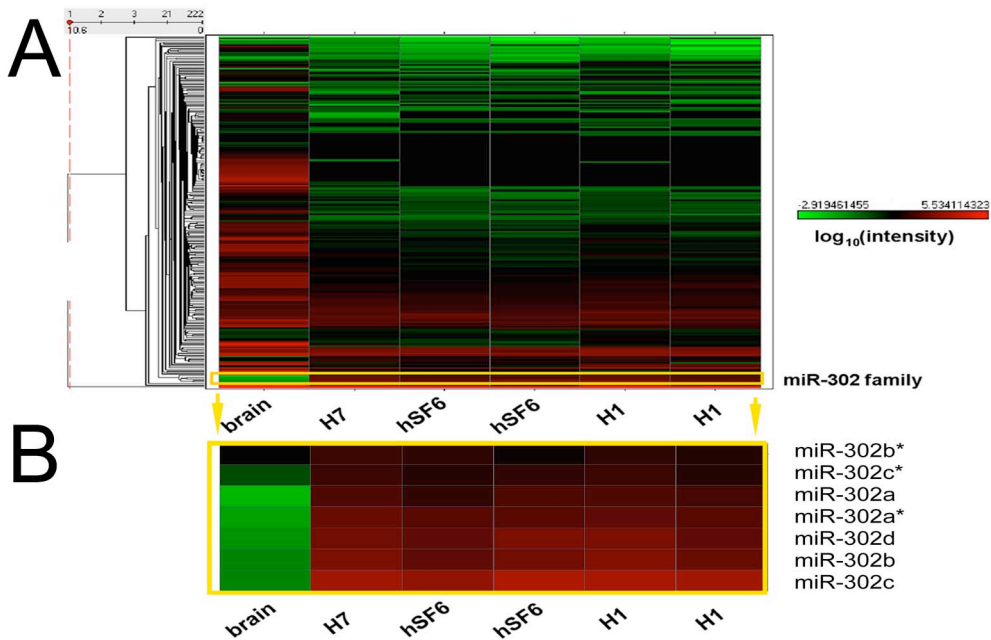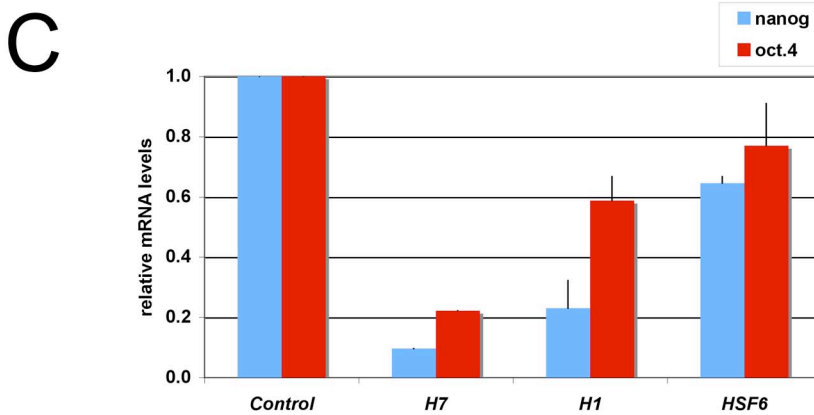

**D** hESC microRNAs that are down-regulated after 4 day differentiation:

miR-18    miR-195    miR-302a\*    miR-302d  
 miR-19a    miR-200a    miR-302b    miR-367  
 miR-19b    miR-200b    miR-302b\*    miR-372  
 miR-106a    miR-204    miR-302c    miR-422b  
 miR-187    miR-302a    miR-302c\*

**Supplementary Figure 1. miRNAs enriched in hESCs.** (A-B) miRNA expression levels were profiled by miRNA qPCR analysis in five undifferentiated hESC samples from three different hESC lines (H1, H7 and HSF6) and from brain tissue, which serves as a differentiated control. Shown is a dendrogram (a tree graph) generated based on the

similarity between the samples or the expression values. miRNA levels are represented as  $\log_{10}$  (intensity). Values range from shared minimum (green) to shared maximum (red). Gold rectangle highlights the miR-302 family, which is also shown as a close-up in panel B. (C) Nanog and Oct4 mRNA levels after 4 day differentiation in three different hESC lines H7, H1 and HSF6 were analyzed by quantitative RT-PCR. (D) List of identified hESC-enriched miRNAs that are down-regulated after 4 day serum forced undirected differentiation.

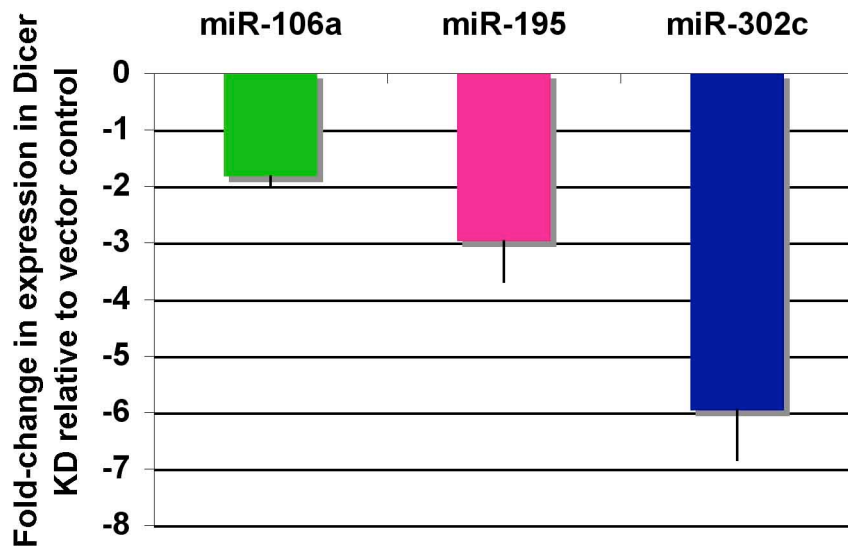

**Supplementary Figure 2. The KD level of candidate miRNAs (miR-106a, 195 and 302c) in *Dicer* KD line.** Fold changes in mature miRNA expression levels are shown for miR-106, 195 and 302c in *Dicer* KD line comparing to the control line. Mean+SD was calculated from three independent experiment based on qPCR assays.

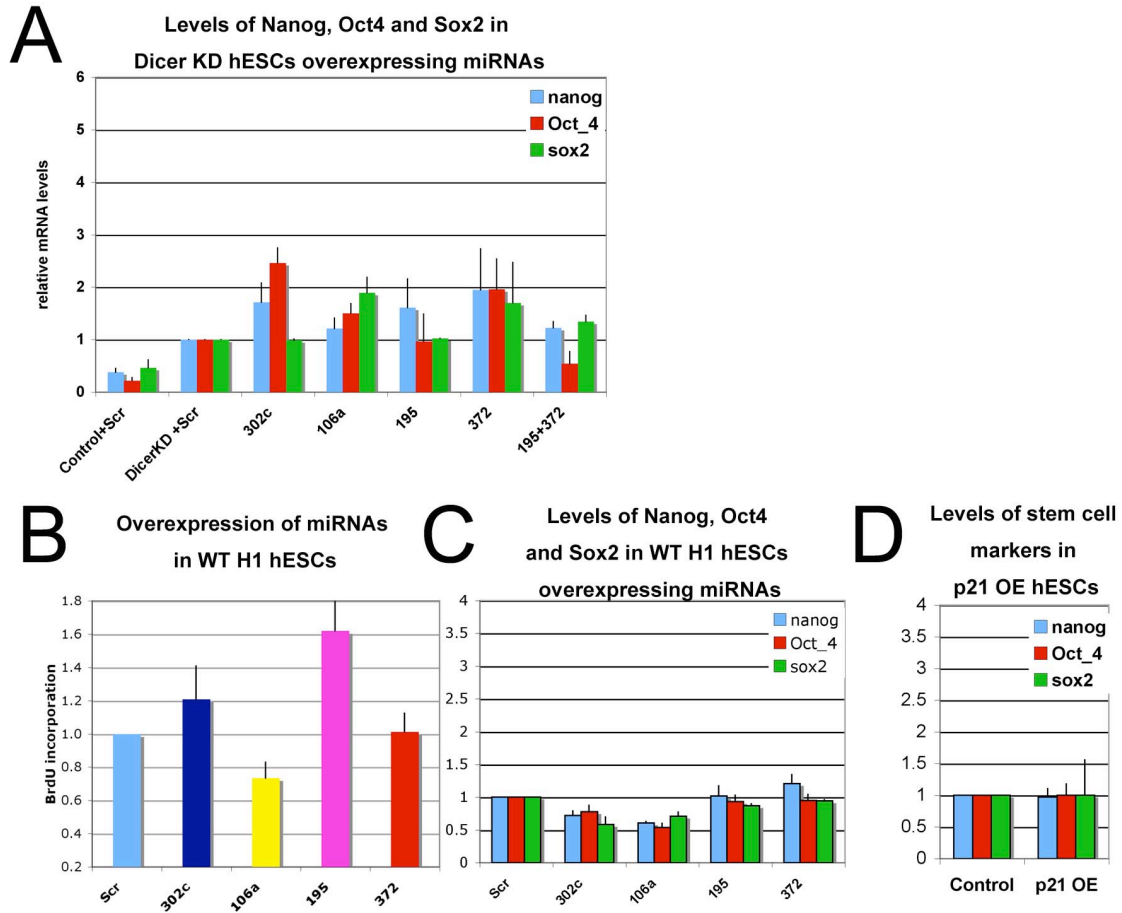

**Supplementary Figure 3. Stem cell markers in hESCs overexpressing miRNAs.** (A) Overexpression of miRNAs in *Dicer*-knockdown hESCs does not reduce stem cell markers *Nanog*, *Oct4* and *Sox2* to the control level. (B) BrdU incorporation in wild-type H1 hESCs overexpressing miR-302c, 106a, 195 or 372 (two separate RNA duplexes used for 106a, IDT and Sigma.) (C) After overexpression of miR-302c, 106a, 195 or 372 in wildtype H1 hESCs, mRNA levels of the stem cell markers *Nanog*, *Oct4* and *Sox2* measured by qPCR (D) Overexpression of p21 in wildtype H1 hESCs does not dramatically change stem cell fate as mRNA levels measured by qPCR of the stem cell markers *Nanog*, *Oct4* and *Sox2* are not dramatically reduced.

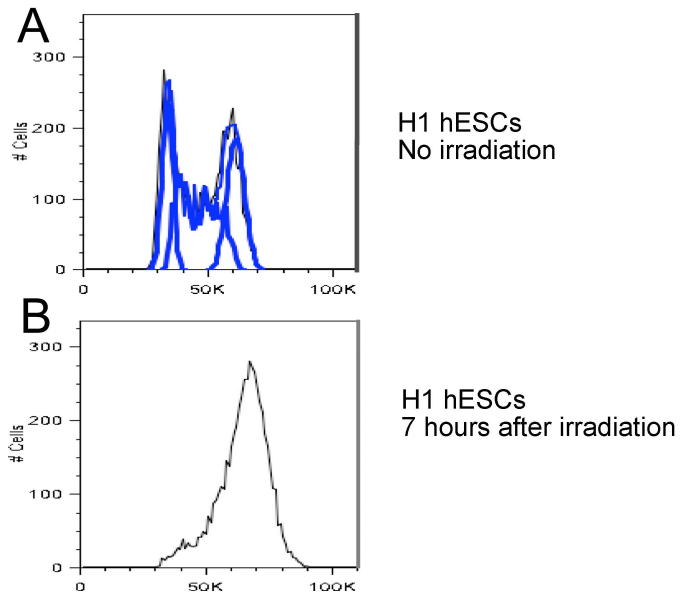

**Supplementary Figure 4. Irradiation-induced G1 checkpoint is not observed in hESCs.** Wild type H1 hESCs were irradiated at 5 Gy. Compared to non-irradiated control (A) which showed typical ES cell cycle distribution with a large percent of cells in the S phase and peaks in both G1 and G2, H1 hESCs did not show G1 arrest after irradiation (B), showing a single peak at G2. This figure shows the result of a representative of four experiments.

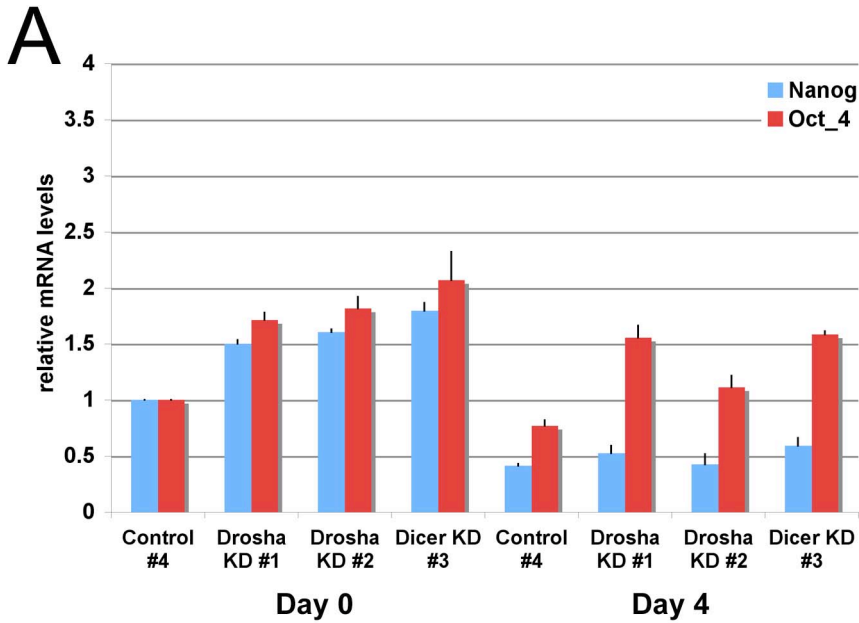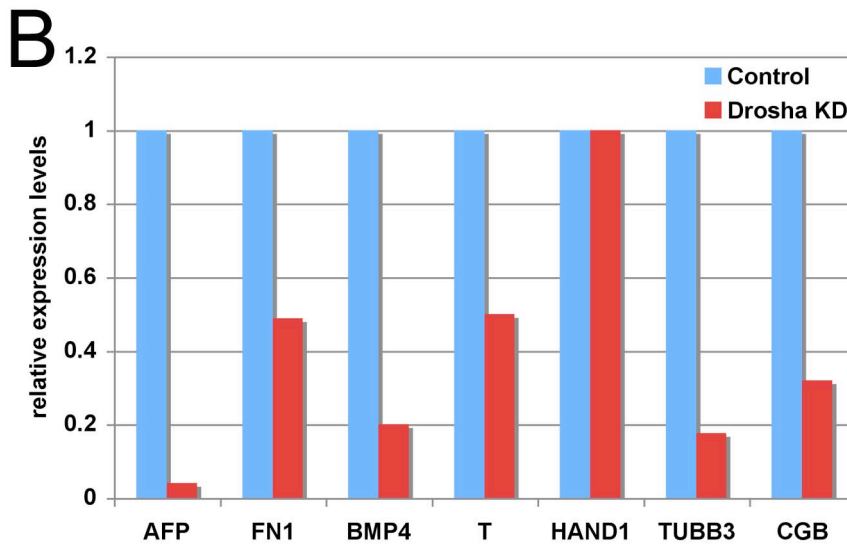

**Supplementary Figure 5. Delayed differentiation in Dicer or Drosha KD hESCs.** (A) Nanog and Oct4 levels in *Dicer*- or *Drosha*-knockdown hESCs after 4 day serum-forced differentiation compared to the control line. Oct4 mRNA levels remain higher in *Drosha* (#1, #2) and *Dicer* (#3) knockdown H1 lines 4 day after differentiation than control line (#4). (B) Relative expression levels of differentiation markers in *Drosha*-knockdown line #2 hESCs compared with the control line after an 11 day serum-forced differentiation, except for T (4 day differentiation) and TUBB3 (20 day differentiation) based on qPCR assays. All the differentiation markers tested showed delayed induction in *Drosha*-knockdown hESCs compared with the control cells except HAND1. The time point was chosen based on when the particular marker was upregulated in the serum forced differentiation protocol used in this experiment.



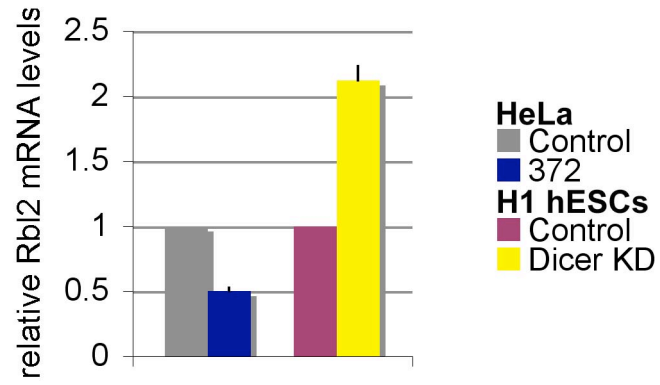

**Supplementary Figure 6. Rbl2 is regulated by miR-372 in HeLa and H1 hESCs.** Rbl2 mRNA levels were reduced in HeLa cells overexpressing miR-372 and increased in *Dicer*-knockdown H1 hESCs.

**Supplementary table 1. Dicer and Drosha KD hESCs do not express differentiation markers.**

| Accession Number | Gene Name | Marker for which germlayer | Day 11 Diff vs UD in wildtype hESCs | Dicer KD Vs Control | Drosha KD #1 Vs Control | Drosha KD #2 Vs Control |
|------------------|-----------|----------------------------|-------------------------------------|---------------------|-------------------------|-------------------------|
| NM_001134        | AFP       | Endoderm                   | 250                                 | 0.9 ± 0.3           | 1.2 ± 0.2               | 0.8 ± 0.4               |
| NM_002026        | FN1       | Endoderm                   | 50                                  | 0.9 ± 0.6           | 1.1 ± 0.3               | 0.7 ± 0.5               |
| NM_130851        | BMP4      | Mesoderm                   | 14                                  | 0.7 ± 0.3           | 0.9 ± 0.1               | 0.8 ± 0.4               |
| NM_004821        | HAND1     | Mesoderm                   | 13                                  | 0.8 ± 0.3           | 0.8 ± 0.3               | 0.6 ± 0.6               |
| NM_006086        | TUBB3     | Ectoderm                   | 2                                   | 1.0 ± 0.0           | 1.3 ± 0.4               | 1.3 ± 0.4               |
| NM_000737        | CGB       | Ectoderm                   | 25                                  | 1.1 ± 0.0           | 1.2 ± 0.2               | 1.2 ± 0.3               |

Note: Mean ± range are shown from two independent microarray analysis for Dicer and Drosha KD hESCs comparing to the control. Day 11 Diff vs UD values are given for comparison. The wildtype H1 hESCs were grown under serum-induced differentiation for 11 days and compared with undifferentiated H1 hESCs for the expression levels of the genes listed above by qPCR. Results are shown in fold changes.

**Supplementary table 2. Fold change of FGF5/REX1/GBX2 genes in Dicer and Drosha knockdown hESCs.**

| Accession Number | Gene Name | Dicer KD Vs Control | Drosha KD #1 Vs Control | Drosha KD #2 Vs Control |
|------------------|-----------|---------------------|-------------------------|-------------------------|
| NM_004464        | FGF5      | 1.0 ± 0.0           | 1.0 ± 0.1               | 1.0 ± 0.6               |
| NM_020695        | REXO1     | 1.4 ± 0.3           | 1.2 ± 0.8               | 1.2                     |
| NM_001485        | GBX2      | 1.0 ± 0.0           | 1.0 ± 0.5               | 1.2 ± 0.2               |

**Supplementary table 3. The “Top20” miRNAs expressed in hESCs.** 9 out of these 20 miRNAs were previously identified by Suh et al. through cloning efforts and 15 by Bar et al. through sequencing efforts.

| miR        | average in undifferentiated | # of sequencing reads in Bar et al., 2008 | cloning frequency in Suh et al., 2004 |
|------------|-----------------------------|-------------------------------------------|---------------------------------------|
| miR-22     | 4770                        | 0                                         | -                                     |
| miR-302c   | 4701                        | 10425                                     | 10                                    |
| miR-365    | 1746                        | 30                                        | -                                     |
| miR-107    | 1325                        | 14                                        | -                                     |
| miR-21     | 1104                        | 64204                                     | 4                                     |
| miR-19     | 953                         | 109                                       | 8                                     |
| miR-302b   | 729                         | 34782                                     | 45                                    |
| miR-302d   | 672                         | 37506                                     | 13                                    |
| miR-191    | 660                         | 434                                       | -                                     |
| miR-106a   | 658                         | Not listed                                | -                                     |
| miR-29b    | 525                         | 12                                        | -                                     |
| miR-367    | 402                         | Not listed                                | -                                     |
| miR-30e-3p | 362                         | 0                                         | -                                     |
| miR-302a*  | 338                         | 498                                       | 6                                     |
| miR-92     | 326                         | 3346                                      | 2                                     |
| miR-17-5p  | 307                         | 7262                                      | 1                                     |
| miR-130a   | 289                         | 119                                       | 1                                     |
| miR-20     | 265                         | 1456                                      | -                                     |
| miR-148a   | 264                         | 0                                         | -                                     |
| miR-143    | 214                         | 10                                        | -                                     |

Note: copy numbers per cell are shown for each miRNA in this table. This data came from qPCR based large-scale miRNA profiling including 220 human miRNA assays. The average was calculated from 5 samples from three undifferentiated hESC lines, H1, H7 and HSF6.

**Supplementary table 4. Primers for qPCR**

| name      | Length | Sequence 5' - 3'          |
|-----------|--------|---------------------------|
| gapdh-SS  | 25     | TGATGACATCAAGAAGCTGGTGAAG |
| gapdh-AS  | 23     | TCCTTGGAGGCCATGTGGGCCAT   |
| Nanog-SS  | 20     | GCTTGCCTTGCTTTGAAGCA      |
| Nanog-AS  | 20     | TTCTTGACTGGGACCTTGTC      |
| Oct4-SS   | 19     | GAGCAAAACCCGGAGGAGT       |
| Oct4-AS   | 19     | TTCTCTTTCGGGCCTGCAC       |
| Sox2-SS   | 21     | CACCTACAGCATGTCCTACTC     |
| Sox2-AS   | 22     | CATGCTGTTTCTTACTCTCCTC    |
| Drosha-SS | 21     | AGGAGTACGCCATAACCAACG     |
| Drosha-AS | 22     | CAATCGTGGAAAGAAGCAGACA    |
| Dicer-SS  | 21     | TTCCTCACCAATGGGTCCTTT     |
| Dicer-AS  | 22     | GCTTCAAGCAGTTCAACCTGAT    |
| Wee1-SS   | 19     | CCCGCCACACAAGACCTTC       |
| Wee1-AS   | 21     | CCCGGAGTTTAACAGAGCTGG     |

**Supplementary table 5. miRNA duplex sequences**

| name                  | Length | Sequence 5' - 3'                                     |
|-----------------------|--------|------------------------------------------------------|
| Scrambled control-SS  | 21     | rArCrUrUrArCrGrArGrUrGrArCrArGrUrArGrArUrU           |
| Scrambled control -AS | 21     | rUrCrUrArCrUrGrUrCrArCrUrCrGrUrArArGrUrUrU           |
| miR-106a (IDT)        | 26     | rArArArArGrUrGrCrUrUrArCrArGrUrGrCrArGrGrUrArGrCrUrU |
| miR-106a-AS (IDT)     | 26     | rGrCrUrArCrCrUrGrCrArCrUrGrUrArArGrCrArCrUrUrUrUrArC |
| miR-106a (Sigma)      | 22     | rArArArArGrUrGrCrUrUrArCrArGrUrGrCrArGrGrUrA         |
| miR-106a-AS (Sigma)   | 22     | rCrCrUrGrCrArCrUrGrUrArArGrCrArCrUrUrUrUrAU          |
| miR-195               | 21     | rUrArGrCrArGrCrArCrArGrArArArUrArUrUrGrGrC           |
| miR-195-AS            | 21     | rCrArArUrArUrUrUrCrUrGrUrGrCrUrGrCrArArArU           |
| miR-195-mismatch-ss   | 21     | rUrGrArCrArGrCrArCrArGrArArArUrArUrUrGrGrC           |
| miR-195-mismatch-AS   | 21     | rCrArArUrArUrUrUrCrUrGrUrGrCrUrGrUrGrArArU           |
| miR-302C*             | 22     | rUrUrUrArArCrArUrGrGrGrGrGrUrArCrCrUrGrCrUrG         |
| mir-302C              | 23     | rUrArArGrUrGrCrUrUrCrCrArUrGrUrUrUrCrArGrUrGrG       |
| miR-372               | 23     | rArArArGrUrGrCrUrGrCrGrArCrArUrUrUrGrArGrCrGrU       |
| mir-372-as            | 23     | rGrCrUrCrArArArUrGrUrCrGrCrArGrCrArCrUrUrUrCrU       |
